# Supplementary material for: Sustainable solar seawater splitting over a BaTaO 2 N photoanode enabled by chloride recirculation
Source: Royal Society of Chemistry journal article supplement (doi:10.1039/d5qi01561h), 2025-10-28
Supplement: d5qi01561h1.pdf [file d5qi01561h1.pdf]

## Supporting Information

### **Sustainable Solar Seawater Splitting over a BaTaO<sub>2</sub>N Photoanode Enabled by Chloride Recirculation**

Jeongsuk Seo\*, Seongeon Mun, Van-Huy Trinh

Department of Chemistry, College of Natural Sciences, Chonnam National University, 77

Yongbong-ro, Buk-gu, Gwangju 61186, Republic of Korea

\*Corresponding author: *j\_seo@chonnam.ac.kr*

Keywords: Solar Seawater Splitting, Hydrogen Production, Perovskite Oxynitrides, Chlorine Evolution Reaction, Chloride Regeneration

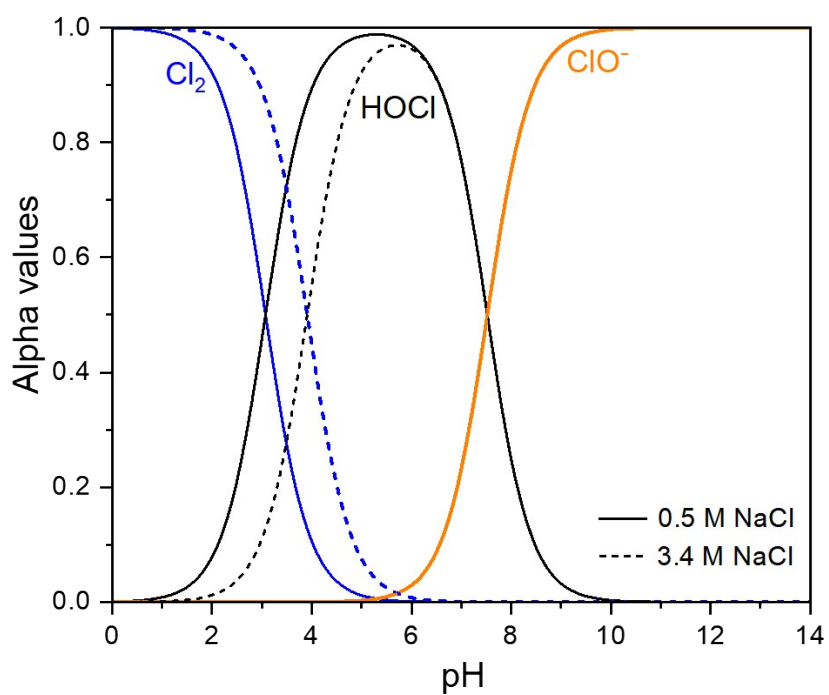

**Figure S1.** Alpha values of free chlorine species, i.e.,  $\text{Cl}_2$ ,  $\text{HOCl}$ , and  $\text{ClO}^-$ , as a function of pH values in aqueous 0.5 and 3.4 M NaCl solutions. The fractions are computed from chemical equilibria (equation 3 and 4) for  $\text{Cl}_2$  hydrolysis and dissociation of  $\text{HOCl}$  acid.

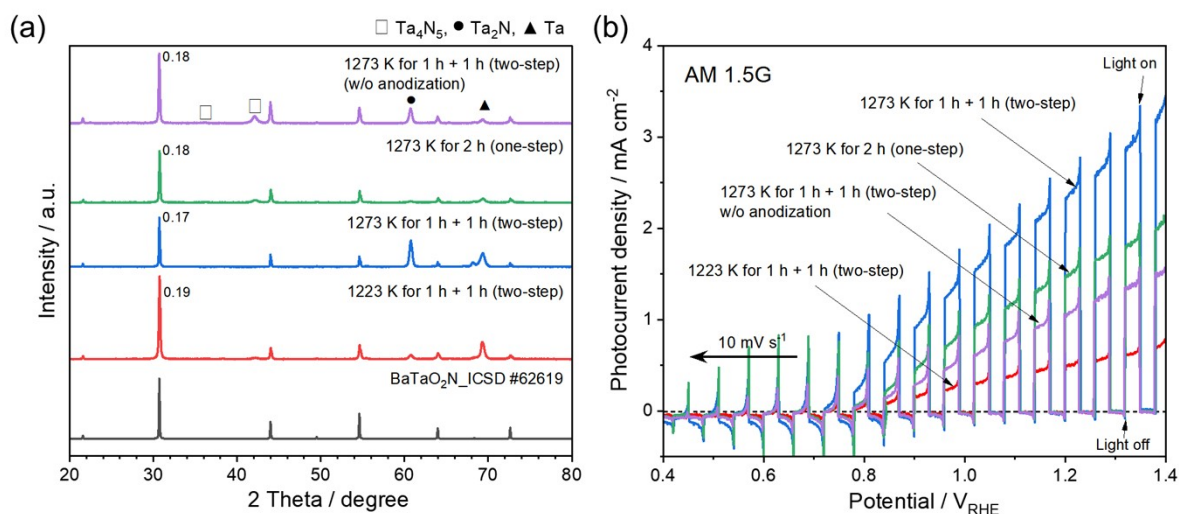

**Figure S2.** (a) XRD patterns for the BaTaO<sub>2</sub>N/Ta photoanodes synthesized through one- and two-step nitridation at 1223 and 1273 K for total 2 h with and without anodization of Ta substrate. (b) LSV data for corresponding Co(OH)<sub>x</sub>/BaTaO<sub>2</sub>N/Ta photoanodes during seawater splitting at pH 6.4 under chopped AM 1.5G simulated sunlight. All photoelectrochemical data were acquired by sweeping the potential from 1.4 to 0.4 V<sub>RHE</sub> at a scan rate of 10 mV s<sup>-1</sup> in an Ar-saturated 0.5 M NaCl aqueous electrolyte buffered with 0.2 M KPi.

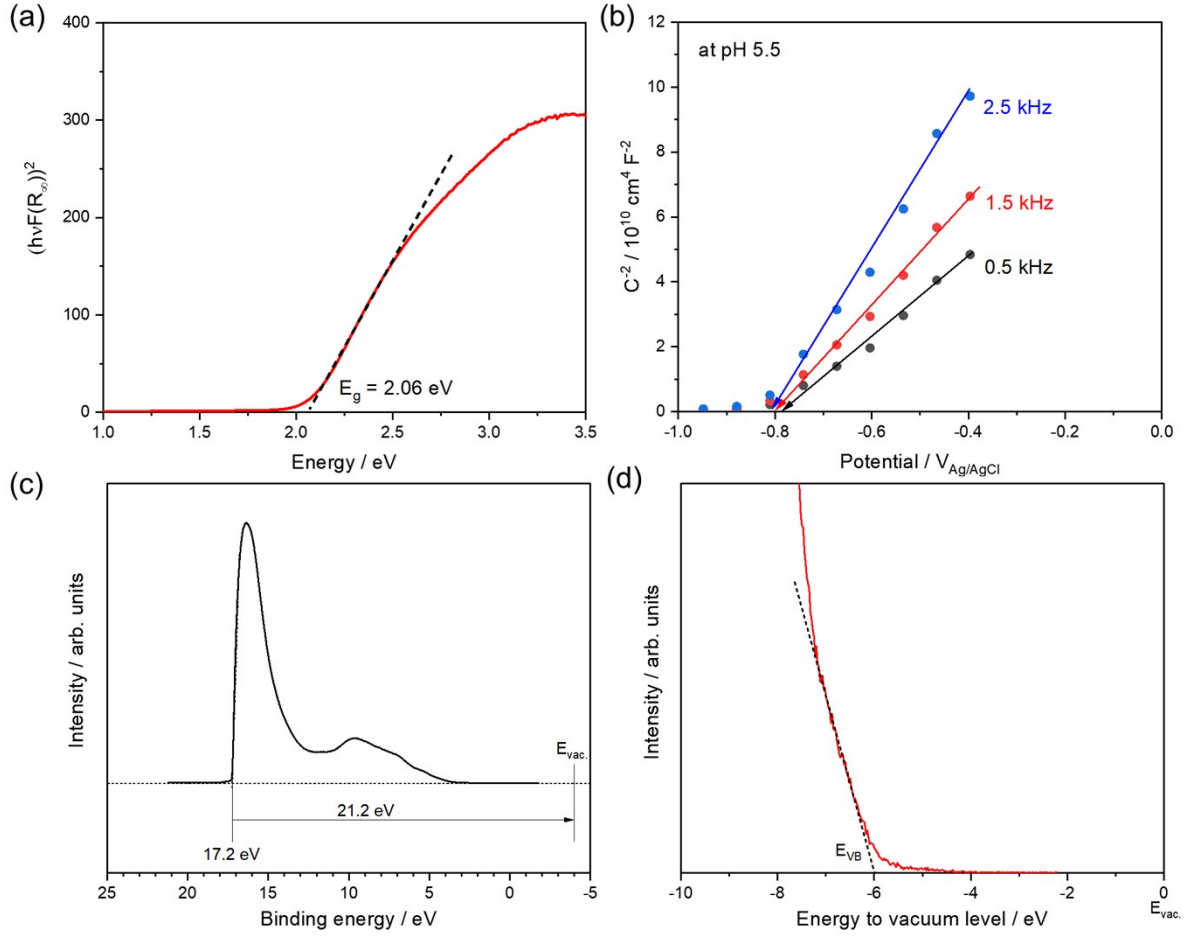

**Figure S3.** (a) A Tauc plot of BaTaO<sub>2</sub>N grown on quartz glass for a direct allowed transition. The Tauc plot was derived from its UV–Vis DRS spectrum using the relation,  $\alpha h\nu = A(h\nu - E_g)^{n/2}$ , where  $\alpha$  is the absorption coefficient,  $h$  is Planck's constant,  $\nu$  is the photon frequency,  $A$  is a proportionality factor, and  $n$  is an exponent that characterizes the type of optical transition in the semiconductor ( $n = 1$  for a direct allowed transition). The intercept on the x-axis corresponds to  $E_g$  of BaTaO<sub>2</sub>N. (b) Mott-Schottky (MS) plots for bare BaTaO<sub>2</sub>N/Ta photoanodes prepared by bottom-up fabrication. The measurements were performed in an Ar-saturated 0.5 M NaCl electrolyte buffered with 0.2 M KPi at pH 5.5 under dark conditions with an AC amplitude of 15 mV at different frequencies of 0.5, 1.5, and 2.5 kHz. The MS plots were analyzed based on the relation  $1/C^2 = 2/(\epsilon\epsilon_0 e N_D)(E - E_{fb})$ , where  $C$  is the space-charge capacitance,  $\epsilon$  is the dielectric constant of the semiconductor,  $\epsilon_0$  is the vacuum permittivity,  $e$  is the elementary charge,  $N_D$  is the donor density,  $E$  is the applied potential, and  $E_{fb}$  is the flat-band potential. The intercept on the x-axis indicates  $E_{fb}$  of BaTaO<sub>2</sub>N. (c) A UPS spectrum of bare BaTaO<sub>2</sub>N/Ta photoanode obtained using  $E_B$  (vs. Fermi) +  $E_K + \Phi_{\text{analyzer}} = 21.2$  eV (see the Experimental Section) and (d) its corresponding spectrum with respect to the vacuum level in the valence band region, transformed by  $E_B$  (vs. vacuum) =  $-(\Phi_{\text{semiconductor}} + E_B \text{ (vs. Fermi)})$ . The work function of the semiconductor was calculated as  $\Phi_{\text{semiconductor}} = 21.2 \text{ eV} - E_{\text{cutoff}} (17.2 \text{ eV})$ .  $E_{VB}$  and conduction band minimum potential,  $E_{CB}$ , of the BaTaO<sub>2</sub>N/Ta photoanode were determined by linear extrapolation of the spectrum in the valence band region and from the relation  $E_{CB} = E_{VB} + E_g$ , respectively.

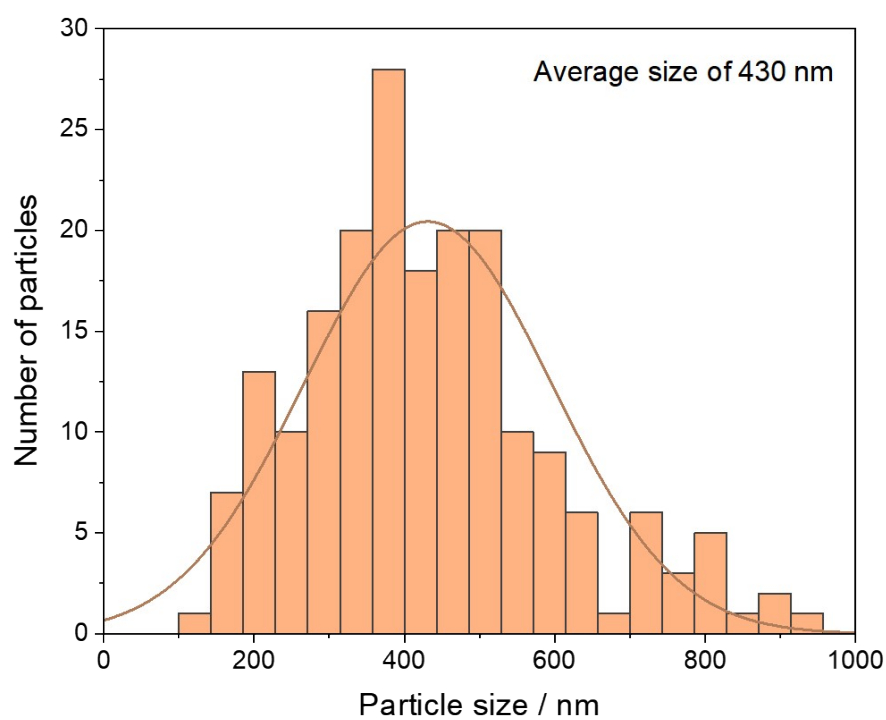

**Figure S4.** Size distribution of cuboidal BaTaO<sub>2</sub>N particles grown on a Ta substrate prepared via bottom-up fabrication.

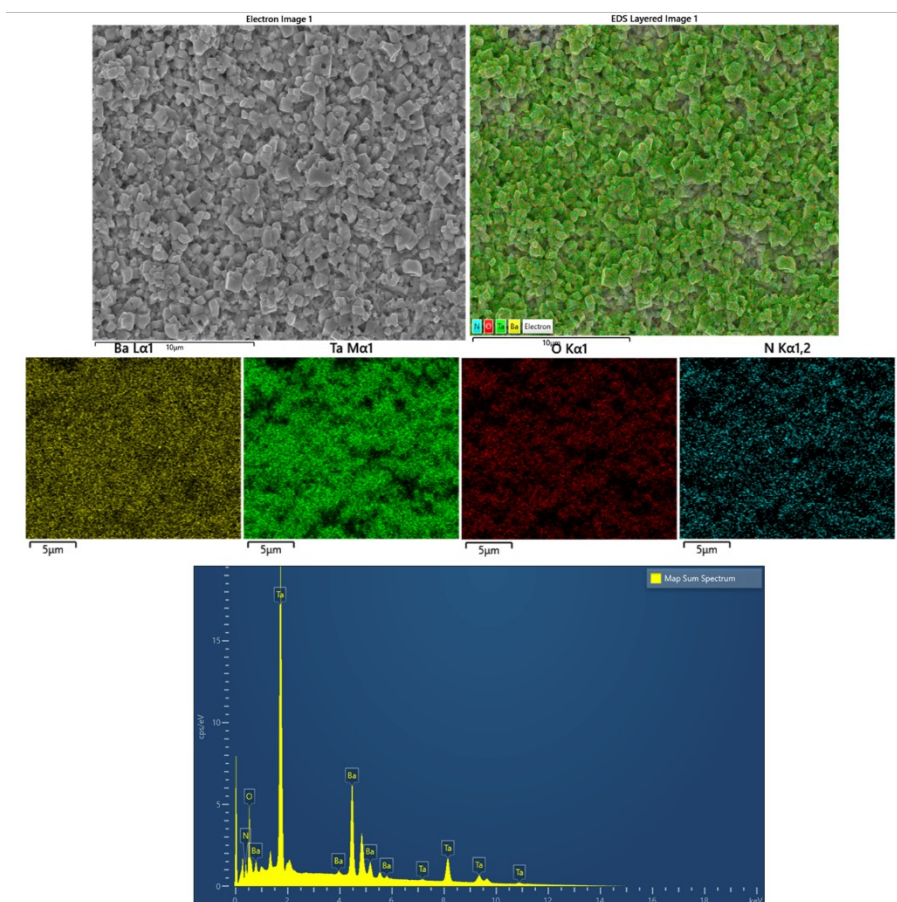

| Region | Ba(%) | Ta(%) | Ba/Ta | O(%) | N(%) | O/N |
|--------|-------|-------|-------|------|------|-----|
| 1      | 24.7  | 21.5  | 1.2   | 34.8 | 19.1 | 1.8 |
| 2      | 24.0  | 21.2  | 1.1   | 35.0 | 19.9 | 1.8 |
| 3      | 24.0  | 21.4  | 1.1   | 34.7 | 20.0 | 1.7 |
| Mean   |       |       | 1.1   |      |      | 1.8 |

**Figure S5.** Elemental EDS mapping of the prepared BaTaO<sub>2</sub>N/Ta photoanode and corresponding surface elemental atomic ratios (Ba/Ta and O/N) measured at three distinct regions.

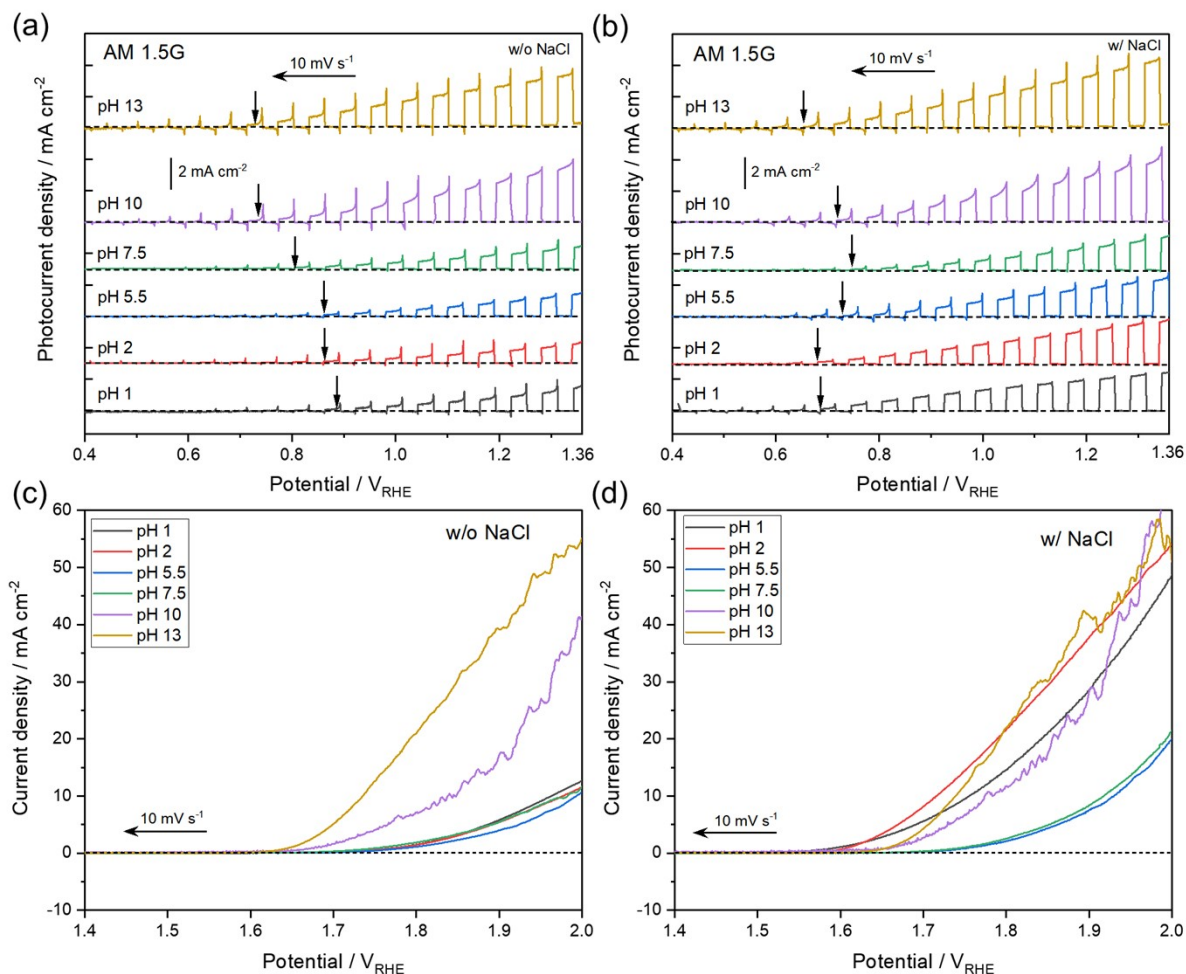

**Figure S6.** (a, b) LSV data for Co(OH)<sub>x</sub>/BaTaO<sub>2</sub>N/Ta photoanodes during (a) water splitting and (b) seawater splitting at different pH under chopped AM 1.5G simulated sunlight. All photoelectrochemical data were acquired by sweeping the potential from 1.36 to 0.4 V<sub>RHE</sub> at a scan rate of 10 mV s<sup>-1</sup> in an Ar-saturated 0.2 M KPi aqueous electrolyte. 0.5 M NaCl was dissolved in the electrolyte for seawater splitting. (c, d) LSV data for Co(OH)<sub>x</sub>/FTO electrodes during (c) water splitting and (d) seawater splitting at different pH in darkness. The electrochemical data were recorded by scanning the potential from 2.0 to 1.4 V<sub>RHE</sub> at a scan rate of 10 mV s<sup>-1</sup> in an Ar-saturated 0.2 M KPi aqueous electrolyte. 0.5 M NaCl was dissolved in the electrolyte for seawater splitting.

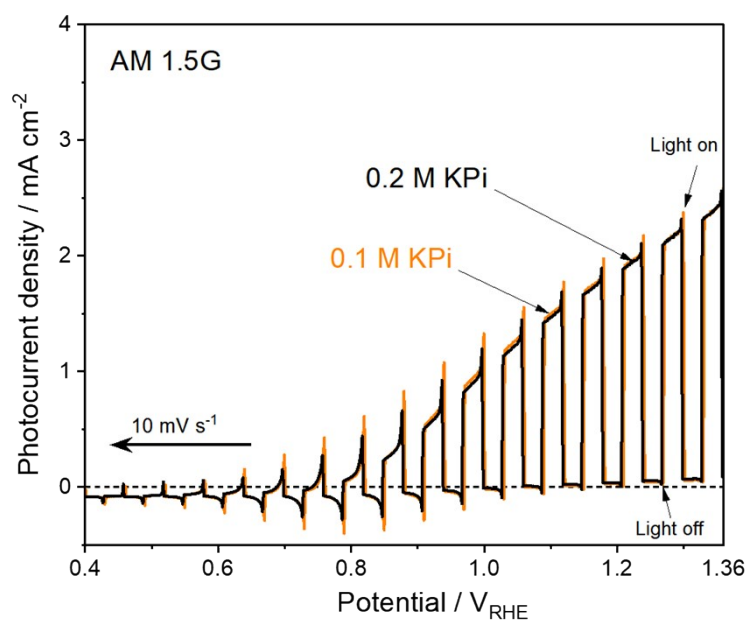

**Figure S7.** LSV data for a Co(OH)<sub>x</sub>/BaTaO<sub>2</sub>N/Ta photoanode during seawater splitting in a 0.5 M NaCl aqueous electrolyte buffered with 0.1 and 0.2 M KPi under chopped AM 1.5 G sunlight.



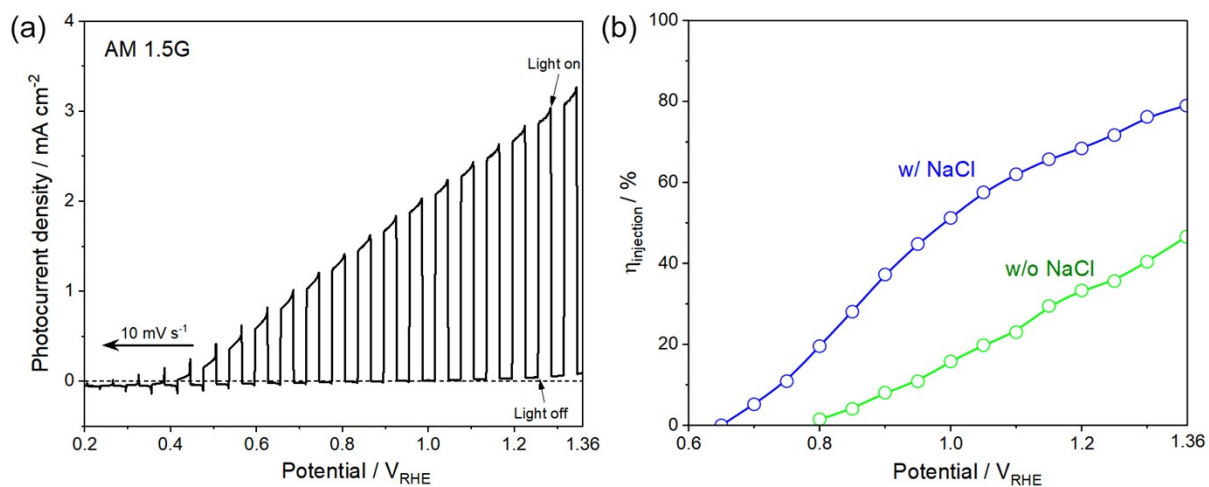

**Figure S8.** (a) LSV data for a  $\text{Co(OH)}_x/\text{BaTaO}_2\text{N}/\text{Ta}$  photoanode during sulfite oxidation in a 0.5 M  $\text{Na}_2\text{SO}_3$  aqueous electrolyte buffered with 0.2 M KPi under chopped AM 1.5 G sunlight. (b) Charge injection efficiencies,  $\eta_{\text{inj}}$  (%), of the corresponding photoanode for seawater (w/ NaCl) and water splitting (w/o NaCl). The efficiencies were quantified from LSV curves presented in Figure 3(c) according to the relation,  $\eta_{\text{inj}} (\%) = J_{\text{w/ NaCl or w/o NaCl}} (V) / J_{\text{Na}_2\text{SO}_3} (V) \times 100$ .

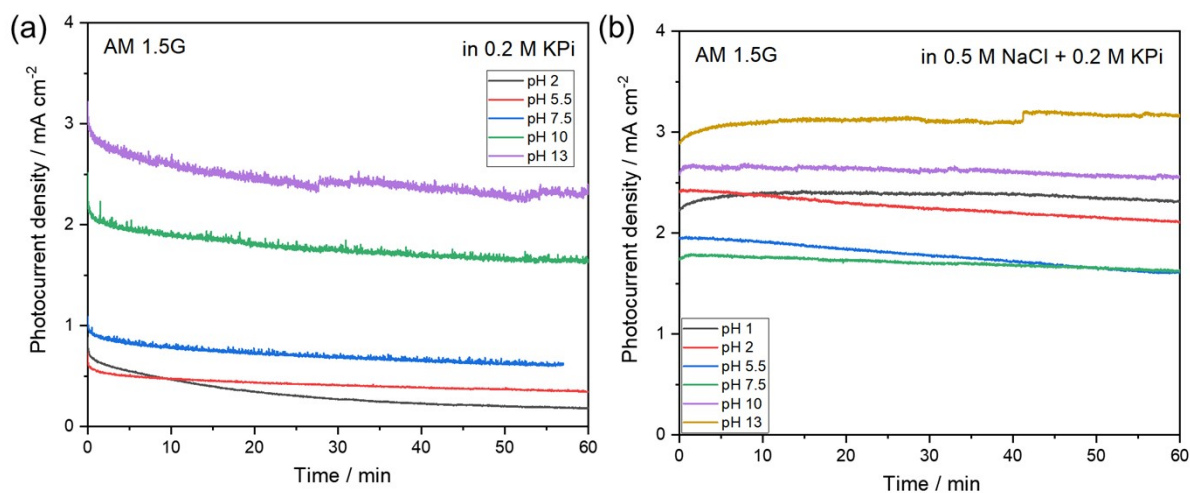

**Figure S9.** Chronoamperometry curves acquired using Co(OH)<sub>x</sub>/BaTaO<sub>2</sub>N/Ta photoanodes during seawater splitting at an applied potential of 1.23 V<sub>RHE</sub> for 1 h under chopped AM 1.5 G simulated sunlight in stirred Ar-saturated 0.2 M KPi aqueous electrolytes dissolved without (a) and with 0.5 M NaCl (b) at different pH values.

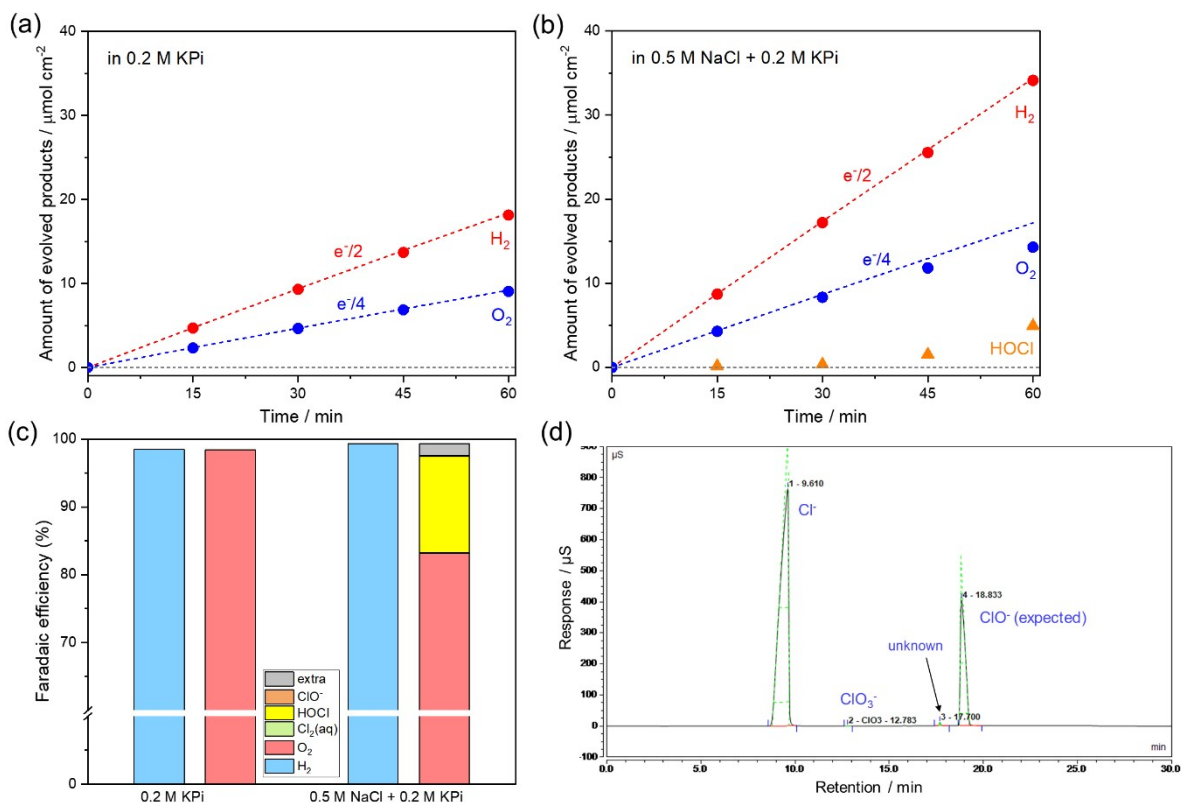

**Figure S10.** Time courses of  $\text{O}_2$  and free chlorine ( $\text{HOCl}$ ),  $\text{H}_2$  generation over the  $\text{Co}(\text{OH})_x/\text{BaTaO}_2\text{N}/\text{Ta}$  photoanode, and a Pt wire during (a) water splitting and (b) seawater splitting at the applied potential of 1.23  $V_{\text{RHE}}$  under AM 1.5G simulated sunlight in Ar-saturated aqueous 0.2 M KPi electrolytes adjusted to pH 5.5. 0.5 M NaCl was dissolved in the electrolyte for seawater splitting. The dashed lines indicate the amounts of  $\text{H}_2$ ,  $\text{HOCl}$  ( $e^-/2$ ), and  $\text{O}_2$  ( $e^-/4$ ) expected for a Faradaic efficiency of unity. (c) A bar chart for Faradaic efficiencies estimated by quantitative analyses of products shown in (a) and (b). (d) An ion chromatogram in an alkaline environment showing  $\text{Cl}^-$ ,  $\text{ClO}_3^-$ , and  $\text{ClO}^-$  species in the electrolyte after solar seawater splitting for 1 h shown in (b).

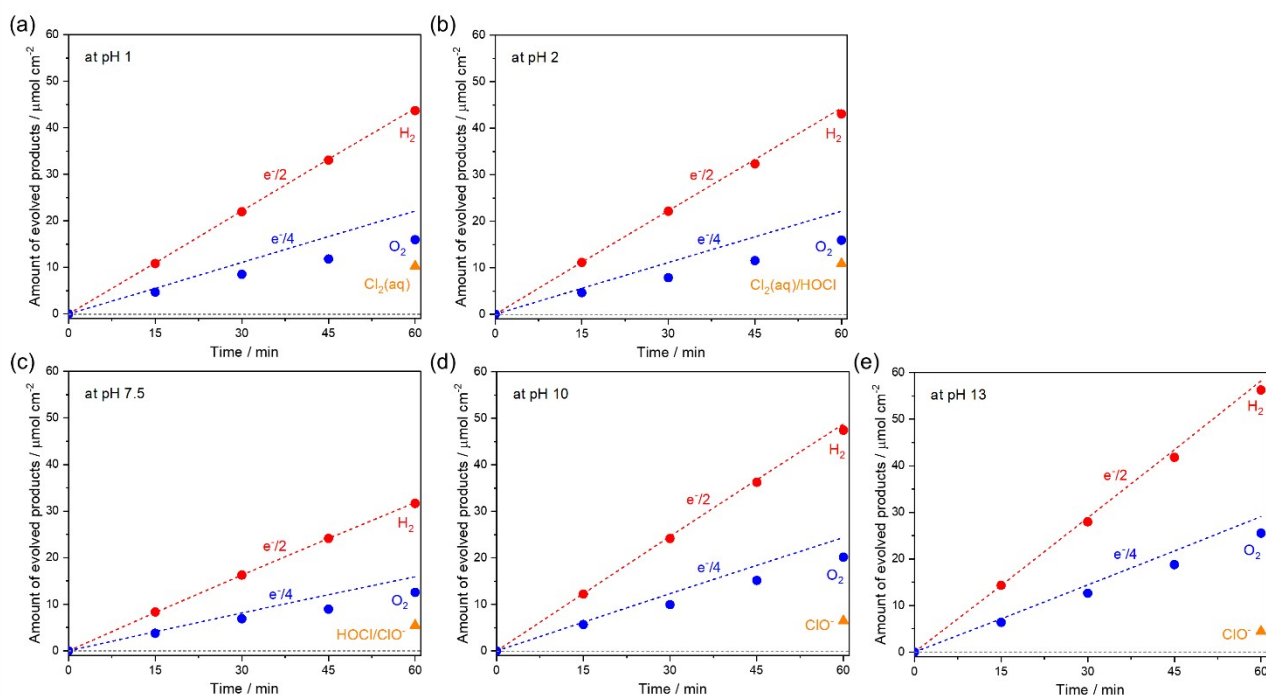

**Figure S11.** Time courses of  $\text{O}_2$  and free chlorine ( $\text{HOCl}$ ),  $\text{H}_2$  generation over the  $\text{Co(OH)}_x/\text{BaTaO}_2\text{N}/\text{Ta}$  photoanodes, and Pt wires during seawater splitting at the applied potential of  $1.23 V_{\text{RHE}}$  under AM 1.5G simulated sunlight in Ar-saturated aqueous 0.5 M NaCl electrolytes buffered with 0.2 M KPi and adjusted to different pH values of (a) 1, (b) 2, (c) 7.5, (d) 10, and (e) 13. The dashed lines indicate the amounts of  $\text{H}_2$ , free chlorine ( $\text{Cl}_2(\text{aq})/\text{HOCl}/\text{ClO}^-$ ) ( $\text{e}^-/2$ ), and  $\text{O}_2$  ( $\text{e}^-/4$ ) expected for a Faradaic efficiency of unity.

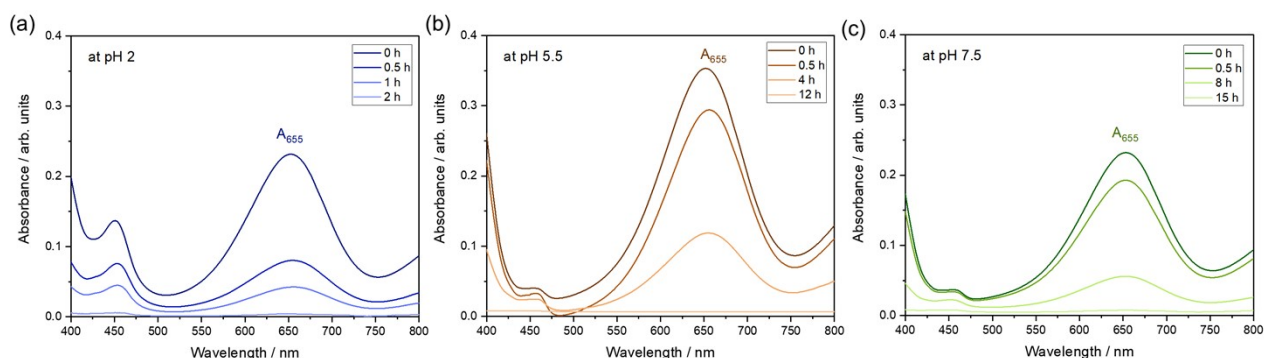

**Figure S12.** UV-vis absorption spectra of the TMB solutions in the presence of different concentrations of free chlorine during the decomposition of free chlorine species in aqueous 2.7  $\mu\text{M}$  NaOCl electrolytes buffered with 0.2 M KPi adjusted to different pH of (a) 2, (b) 5.5, and (c) 7.5 under AM 1.5G simulated sunlight irradiation, shown in Figure 4(a). Since the absorbance of oxidized TMB at 655 nm is pH-dependent, the concentration of free chlorine was calibrated separately for each pH. A gradual decrease in  $A_{655}$  over time was observed, indicating the progressive decomposition of free chlorine and the corresponding decline in its concentration.

**Table S1.** Summary of reported BaTaO<sub>2</sub>N photoanodes prepared by different synthesis routes and their photoelectrochemical activity and long-term stability, compared with the present work.

| Year | Photoanode                                                     | Synthesis                            | Photocurrent density                                                     | Retention        | Reference                                   |
|------|----------------------------------------------------------------|--------------------------------------|--------------------------------------------------------------------------|------------------|---------------------------------------------|
| 2025 | Co(OH) <sub>x</sub> /BaTaO <sub>2</sub> N/Ta                   | Bottom-up fabrication                | 2 mA cm <sup>-2</sup> at 1.23 V <sub>RHE</sub> in 0.5 M NaCl (pH 5.5)    | 81% for 24 h     | This work                                   |
| 2015 | Co/BaTaO <sub>2</sub> N/Ta/Ti                                  | Particle transfer                    | 4.2 mA cm <sup>-2</sup> at 1.20 V <sub>RHE</sub> in 0.5 M KPi (pH 13)    | 80% for 6 h      | J. Am. Chem. Soc. 137 (2015) 2227           |
| 2016 | CoPi/BaTaO <sub>2</sub> N/Ta                                   | Hydrothermal method                  | 0.75 mA cm <sup>-2</sup> at 1.23 V <sub>RHE</sub> in 0.5 M KPi (pH 13)   | 97% for 5 h      | J. Phys. Chem. C 120 (2016) 15758.          |
| 2019 | Co(OH) <sub>x</sub> -FeO <sub>y</sub> /BaTaO <sub>2</sub> N/Ti | Particle transfer                    | 6.5 mA cm <sup>-2</sup> at 1.23 V <sub>RHE</sub> in 0.5 M KBi (pH 13)    | 79% for 24 h     | ACS Appl. Energy Mater., 2(8), (2018) 5777. |
| 2019 | CoO <sub>x</sub> /BaTaO <sub>2</sub> N/Ta/Ti                   | Particle transfer                    | 3.11 mA cm <sup>-2</sup> at 1.20 V <sub>RHE</sub> in 0.2 M KPi (pH 13)   | -                | Faraday Discuss., 215, (2019) 227           |
| 2020 | CoO <sub>x</sub> /BaTaO <sub>2</sub> N/Ta <sub>2</sub> N/Ta    | Interfacial reaction                 | 4.6 mA cm <sup>-2</sup> at 1.23 V <sub>RHE</sub> in 0.1 M KPi (pH 13)    | 65% for 3 h      | Solar RRL 4, (2020) 1900542.                |
| 2020 | CoO <sub>x</sub> /BaTaO <sub>2</sub> N/FTO                     | Electrophoretic deposition           | 2.05 mA cm <sup>-2</sup> at 1.23 V <sub>RHE</sub> in 0.1 M KOH (pH = 13) | 94% for 1 h      | Chem. Comm., 57, (2021) 4412                |
| 2022 | NiCoFe-B <sub>i</sub> /BaTaO <sub>2</sub> N/Nb                 | Dual-source electron beam deposition | 4.7 mA cm <sup>-2</sup> at 1.23 V <sub>RHE</sub> in 1 M KOH (pH = 13.6)  | 78.5% for 13.3 h | J. Catal., 411, (2022) 109                  |

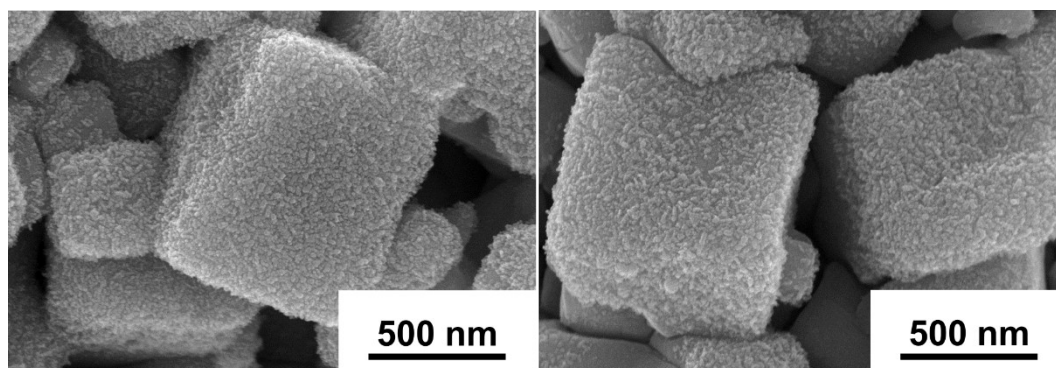

**Figure S13.** Top-view SEM images of Co(OH)<sub>x</sub>/BaTaO<sub>2</sub>N/Ta photoanodes after long term seawater splitting for 24 h at an applied potential of 1.23 V<sub>RHE</sub> under chopped AM 1.5 G simulated sunlight in stirred Ar-saturated 0.5 M NaCl electrolyte buffered with 0.2 M KPi and adjusted to pH 5.5.
